# Supplementary material for: Long-Term Follow-Up of Inpatients with Failed Back Surgery Syndrome Who Received Integrative Korean Medicine Treatment: A Retrospective Analysis and Questionnaire Survey Study
Source: MDPI journal article supplement (doi:10.3390/jcm10081703), 2021-04-15
Supplement: s1 [file s1]

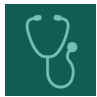

**Table S1.** Characteristics of patients with FBSS.

| Characteristics                                          | Respondent<br>( <i>n</i> = 106) | Non-respondent<br>( <i>n</i> = 128) | <i>p</i> -value |
|----------------------------------------------------------|---------------------------------|-------------------------------------|-----------------|
| <b>Age</b>                                               |                                 |                                     |                 |
| Mean ± SD                                                | 53.8 ± 11.9                     | 55.8 ± 11.1                         | 0.171           |
| 20≤, <30                                                 | 2 (1.9)                         | 1 (0.8)                             | 0.562           |
| 30≤, <40                                                 | 15 (14.2)                       | 12 (9.4)                            |                 |
| 40≤, <50                                                 | 23 (21.7)                       | 26 (20.3)                           |                 |
| 50≤, <60                                                 | 23 (21.7)                       | 31 (24.2)                           |                 |
| 60≤, <70                                                 | 40 (37.7)                       | 49 (38.3)                           |                 |
| 70≤                                                      | 3 (2.8)                         | 9 (7.0)                             |                 |
| <b>Sex</b>                                               |                                 |                                     |                 |
| Male                                                     | 35 (33.0)                       | 58 (45.3)                           | 0.075           |
| Female                                                   | 71 (67.0)                       | 70 (54.7)                           |                 |
| <b>Length of hospital stay</b>                           |                                 |                                     |                 |
| Mean ± SD (day)                                          | 30.5 ± 17.9                     | 26.1 ± 16.1                         | 0.051           |
| Median (IQR)                                             | 26.5 [17 – 39.8]                | 21.5 [13 – 38]                      |                 |
| <b>Type of spinal surgery<sup>1</sup></b>                |                                 |                                     |                 |
| Laminectomy                                              | 95 (89.6)                       | 114 (89.1)                          | 1               |
| Discectomy                                               | 15 (14.2)                       | 16 (12.5)                           | 0.859           |
| Spinal fusion                                            | 32 (30.2)                       | 39 (30.5)                           | 1               |
| Vertebroplasty                                           | 2 (1.9)                         | 0 (0.0)                             | 0.397           |
| Artificial disc replacement                              | 5 (4.7)                         | 7 (5.5)                             | 1               |
| <b>Operated disc levels<sup>1</sup></b>                  |                                 |                                     |                 |
| L1-2                                                     | 2 (1.9)                         | 7 (5.5)                             | 0.282           |
| L2-3                                                     | 5 (4.7)                         | 8 (6.2)                             | 0.824           |
| L3-4                                                     | 17 (16.0)                       | 19 (14.8)                           | 0.944           |
| L4-5                                                     | 73 (68.9)                       | 84 (65.6)                           | 0.7             |
| L5-S1                                                    | 43 (40.6)                       | 41 (32.0)                           | 0.223           |
| <b>Onset</b>                                             |                                 |                                     |                 |
| Mean ± SD (day)                                          | 246.3 ± 573.8                   | 169.7 ± 394.1                       | 0.229           |
| Median (IQR)                                             | 46 [7 – 153]                    | 38.5 [7 – 122]                      |                 |
| <b>Mode of onset</b>                                     |                                 |                                     | 0.481           |
| No specific cause                                        | 69 (65.1)                       | 81 (63.3)                           |                 |
| Overwork / Over exercise                                 | 16 (15.1)                       | 26 (20.3)                           |                 |
| Trauma / Fall                                            | 17 (16.0)                       | 16 (12.5)                           |                 |
| Other                                                    | 4 (3.8)                         | 3 (2.3)                             |                 |
| Unknown                                                  | 0 (0.0)                         | 2 (1.6)                             |                 |
| <b>Analgesics<sup>†</sup></b>                            |                                 |                                     |                 |
| Mean ± SD                                                | 2.9 ± 10.6                      | 4.2 ± 10.4                          | 0.319           |
| Median (IQR)                                             | 0 [0 – 0]                       | 0 [0 – 6.3]                         |                 |
| <b>Steroid injections<sup>†</sup></b>                    |                                 |                                     |                 |
| Mean ± SD                                                | 1.1 ± 5.0                       | 0.8 ± 1.3                           | 0.559           |
| Median (IQR)                                             | 0 [0 – 1]                       | 0 [0 – 1]                           |                 |
| <b>Radiological findings of MRI/CT scans<sup>1</sup></b> |                                 |                                     |                 |
| Herniation of the nucleus pulposus                       | 61 (57.5)                       | 68 (53.1)                           | 0.586           |
| Protrusion                                               | 40 (37.7)                       | 37 (28.9)                           | 0.197           |
| Extrusion                                                | 34 (32.1)                       | 43 (33.6)                           | 0.915           |
| Sequestration                                            | 0 (0.0)                         | 0 (0.0)                             | —               |
| Spinal stenosis                                          | 31 (29.2)                       | 36 (28.1)                           | 0.965           |
| Central canal                                            | 18 (17.0)                       | 24 (18.8)                           | 0.857           |
| Foraminal                                                | 20 (18.9)                       | 22 (17.2)                           | 0.871           |
| Spondylolisthesis                                        | 10 (9.4)                        | 7 (5.5)                             | 0.363           |
| Vertebral fracture                                       | 5 (4.7)                         | 6 (4.7)                             | 1               |
| Other                                                    | 1 (0.9)                         | 1 (0.8)                             | 1               |
| <b>Comorbidity<sup>1</sup></b>                           |                                 |                                     |                 |
| Hypertension                                             | 22 (20.8)                       | 15 (11.7)                           | 0.088           |
| Diabetes mellitus                                        | 10 (9.4)                        | 12 (9.4)                            | 1               |

|                                           |             |             |       |
|-------------------------------------------|-------------|-------------|-------|
| Cardiovascular disease                    | 23 (21.7)   | 21 (16.4)   | 0.388 |
| Thyroid-related comorbidity               | 4 (3.8)     | 0 (0.0)     | 0.087 |
| Liver-related comorbidity                 | 3 (2.8)     | 7 (5.5)     |       |
| Other                                     | 27 (25.5)   | 36 (28.1)   |       |
| <b>Smoking</b>                            |             |             | 0.068 |
| Yes                                       | 14 (13.2)   | 30 (23.4)   |       |
| No                                        | 92 (86.8)   | 98 (76.6)   |       |
| <b>Alcohol intake</b>                     |             |             | 0.66  |
| Yes                                       | 20 (18.9)   | 24 (18.8)   |       |
| No                                        | 86 (81.1)   | 103 (80.5)  |       |
| Unknown                                   | 0 (0.0)     | 1 (0.8)     |       |
| <b>Occupation</b>                         |             |             | 0.466 |
| Unemployed <sup>‡</sup>                   | 62 (58.5)   | 71 (55.5)   |       |
| Office work <sup>§</sup>                  | 25 (23.6)   | 38 (29.7)   |       |
| Service or retail industry <sup>11</sup>  | 13 (12.3)   | 9 (7.0)     |       |
| Manual labour <sup>††</sup>               | 6 (5.7)     | 9 (7.0)     |       |
| Unknown                                   | 0 (0)       | 1 (0.8)     |       |
| <b>NRS score of LBP at admission</b>      | 5.9 ± 1.4   | 5.7 ± 1.3   | 0.368 |
| <b>NRS score of leg pain at admission</b> | 4.6 ± 2.6   | 4.3 ± 2.9   | 0.397 |
| <b>ODI score at admission</b>             | 51.1 ± 15.7 | 50.1 ± 17.3 | 0.626 |
| <b>EQ5D score at admission</b>            | 0.5 ± 0.2   | 0.5 ± 0.2   | 0.634 |

<sup>1</sup> Multiple check. <sup>‡</sup> Treatments before admission. <sup>§</sup> Housewife/student/retired. <sup>§</sup> Office worker/manager/public servant/professional practitioner. <sup>11</sup> Self-employed/service or retail industry worker. <sup>††</sup> Agriculture, forestry, fishery, or mining industry worker/equipment mechanic or machinery operator/professional soldier. FBSS: Failed back surgery syndrome; SD: Standard deviation; IQR: Interquartile range; MRI: Magnetic resonance imaging; CT: Computed tomography NRS: Numeric rating scale; LBP: Low back pain; ODI: Oswestry disability index; EQ-5D: EuroQol 5-dimension.

**Table S2.** Type of integrative Korean medicine treatment (n = 234).

|                      | <b>N (%)</b> | <b>Mean ± SD</b> |
|----------------------|--------------|------------------|
| Herbal medicine      | 232 (99.1%)  | 82.0 ± 50.6      |
| Acupuncture          | 234 (100%)   | 52.1 ± 32.1      |
| Pharmacopuncture     | 234 (100%)   | 51.2 ± 32.3      |
| Chuna manual therapy | 220 (94.0%)  | 26.1 ± 16.9      |
| Traction therapy     | 37 (15.80%)  | 20.5 ± 13.6      |
| Hot packs            | 149 (63.70%) | 19.2 ± 16.4      |

SD: Standard deviation.
